# Supplementary material for: Experimental diabetes exacerbates autophagic flux impairment during myocardial I/R injury through calpain‐mediated cleavage of Atg5/LAMP2
Source: PubMed Central journal article supplement (PMC9843523; doi:10.1111/jcmm.17642), 2022-12-23

Con

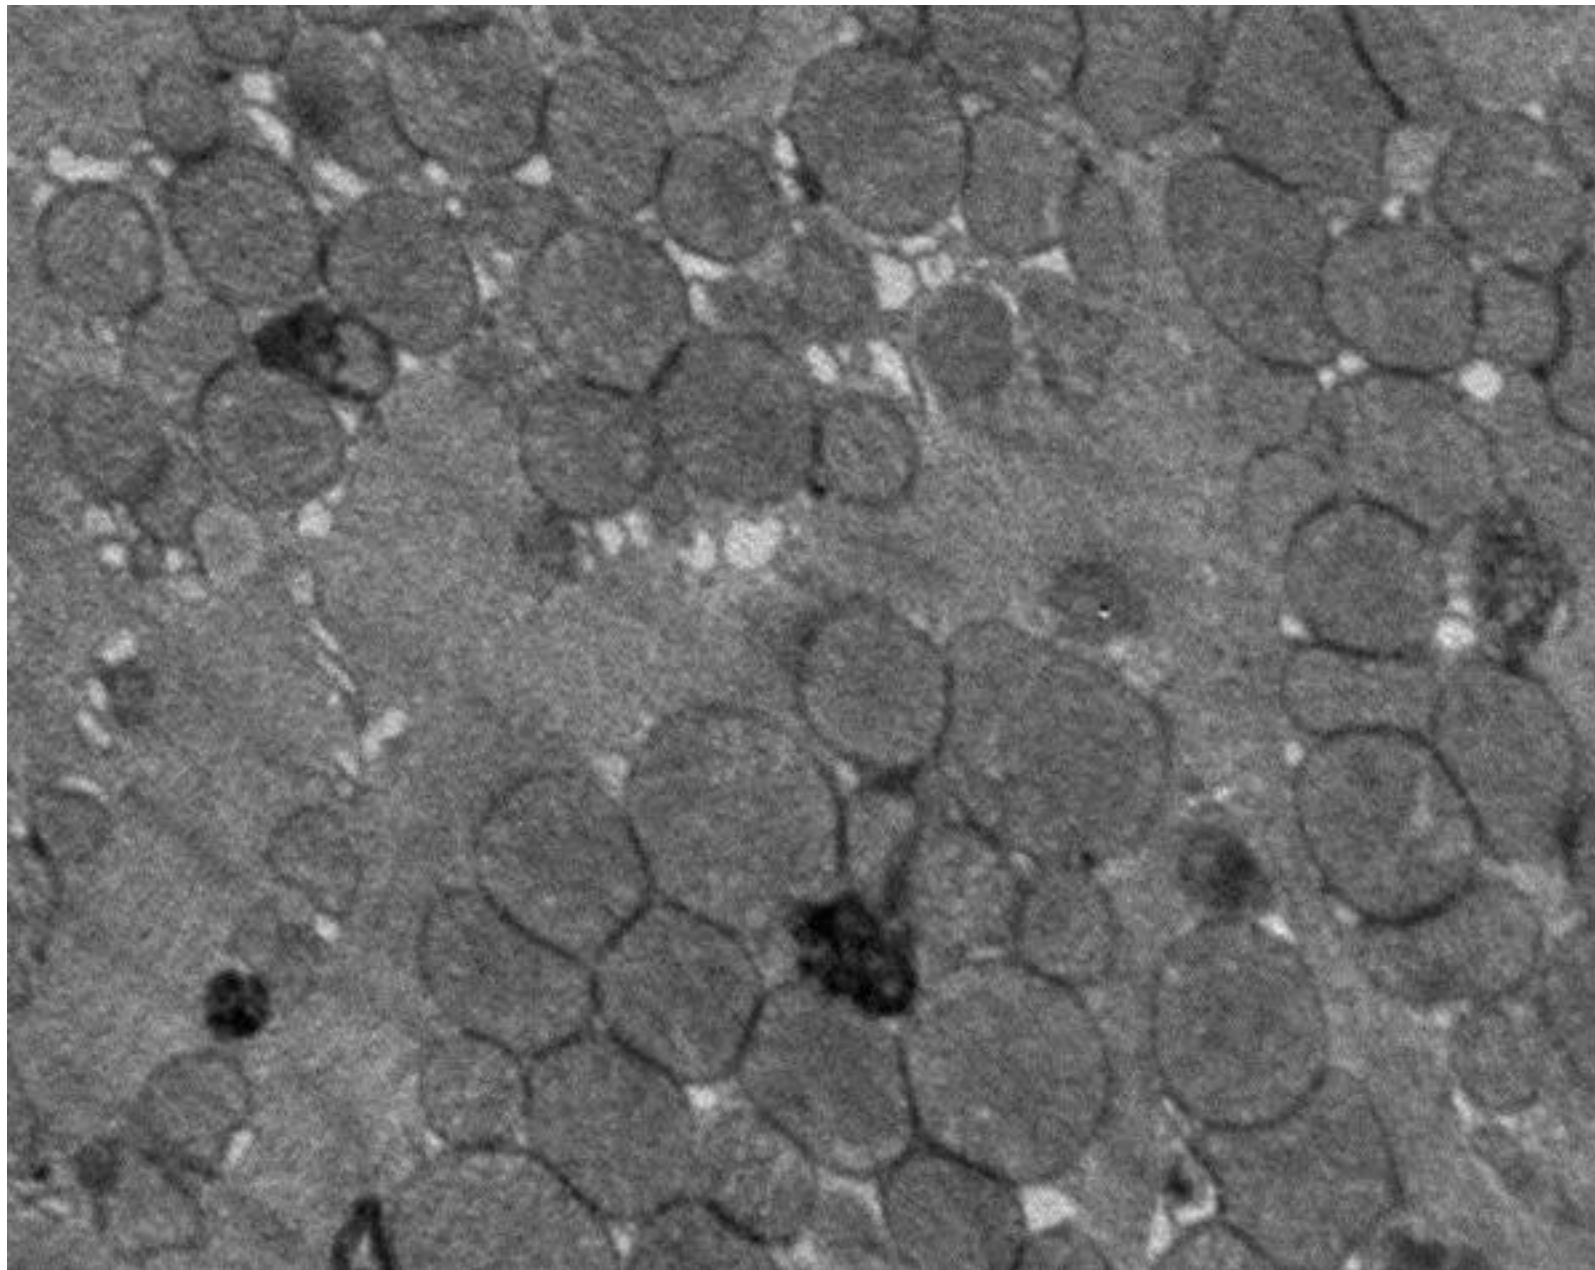

STZ

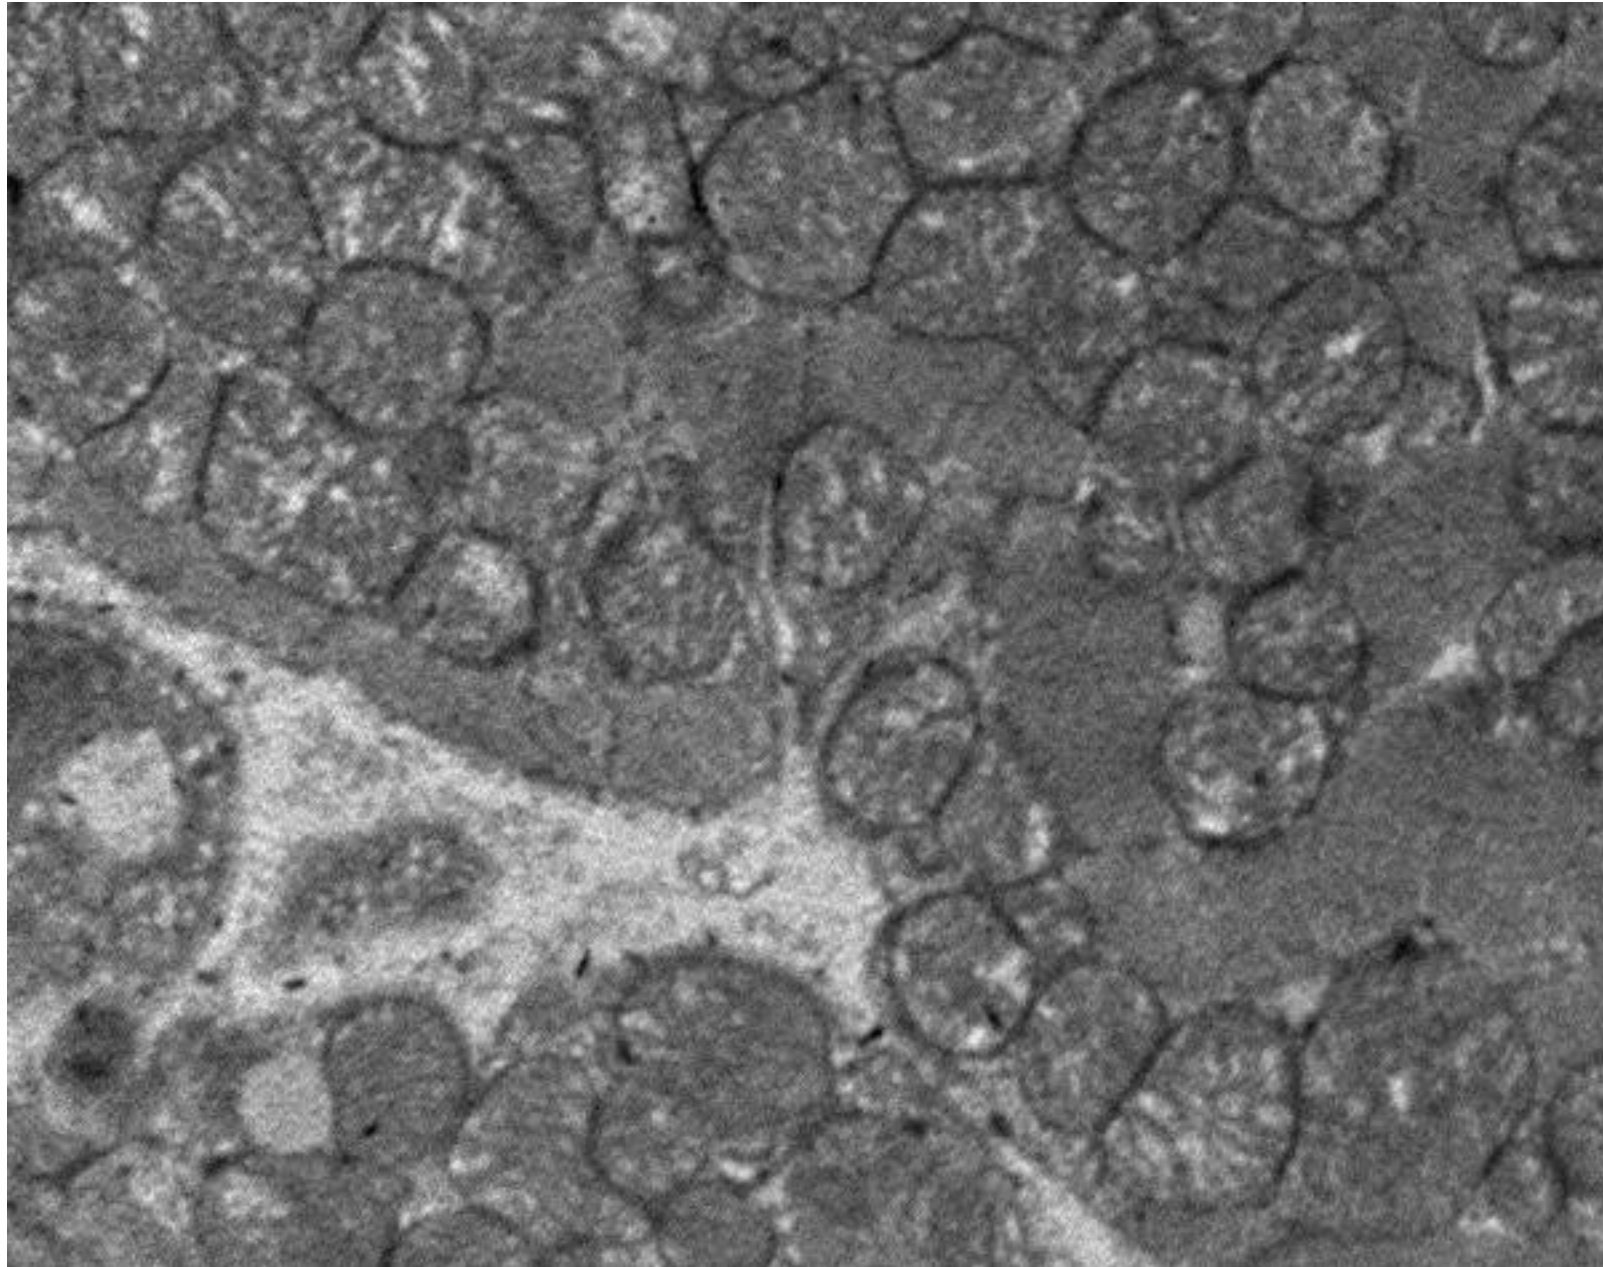

I/R

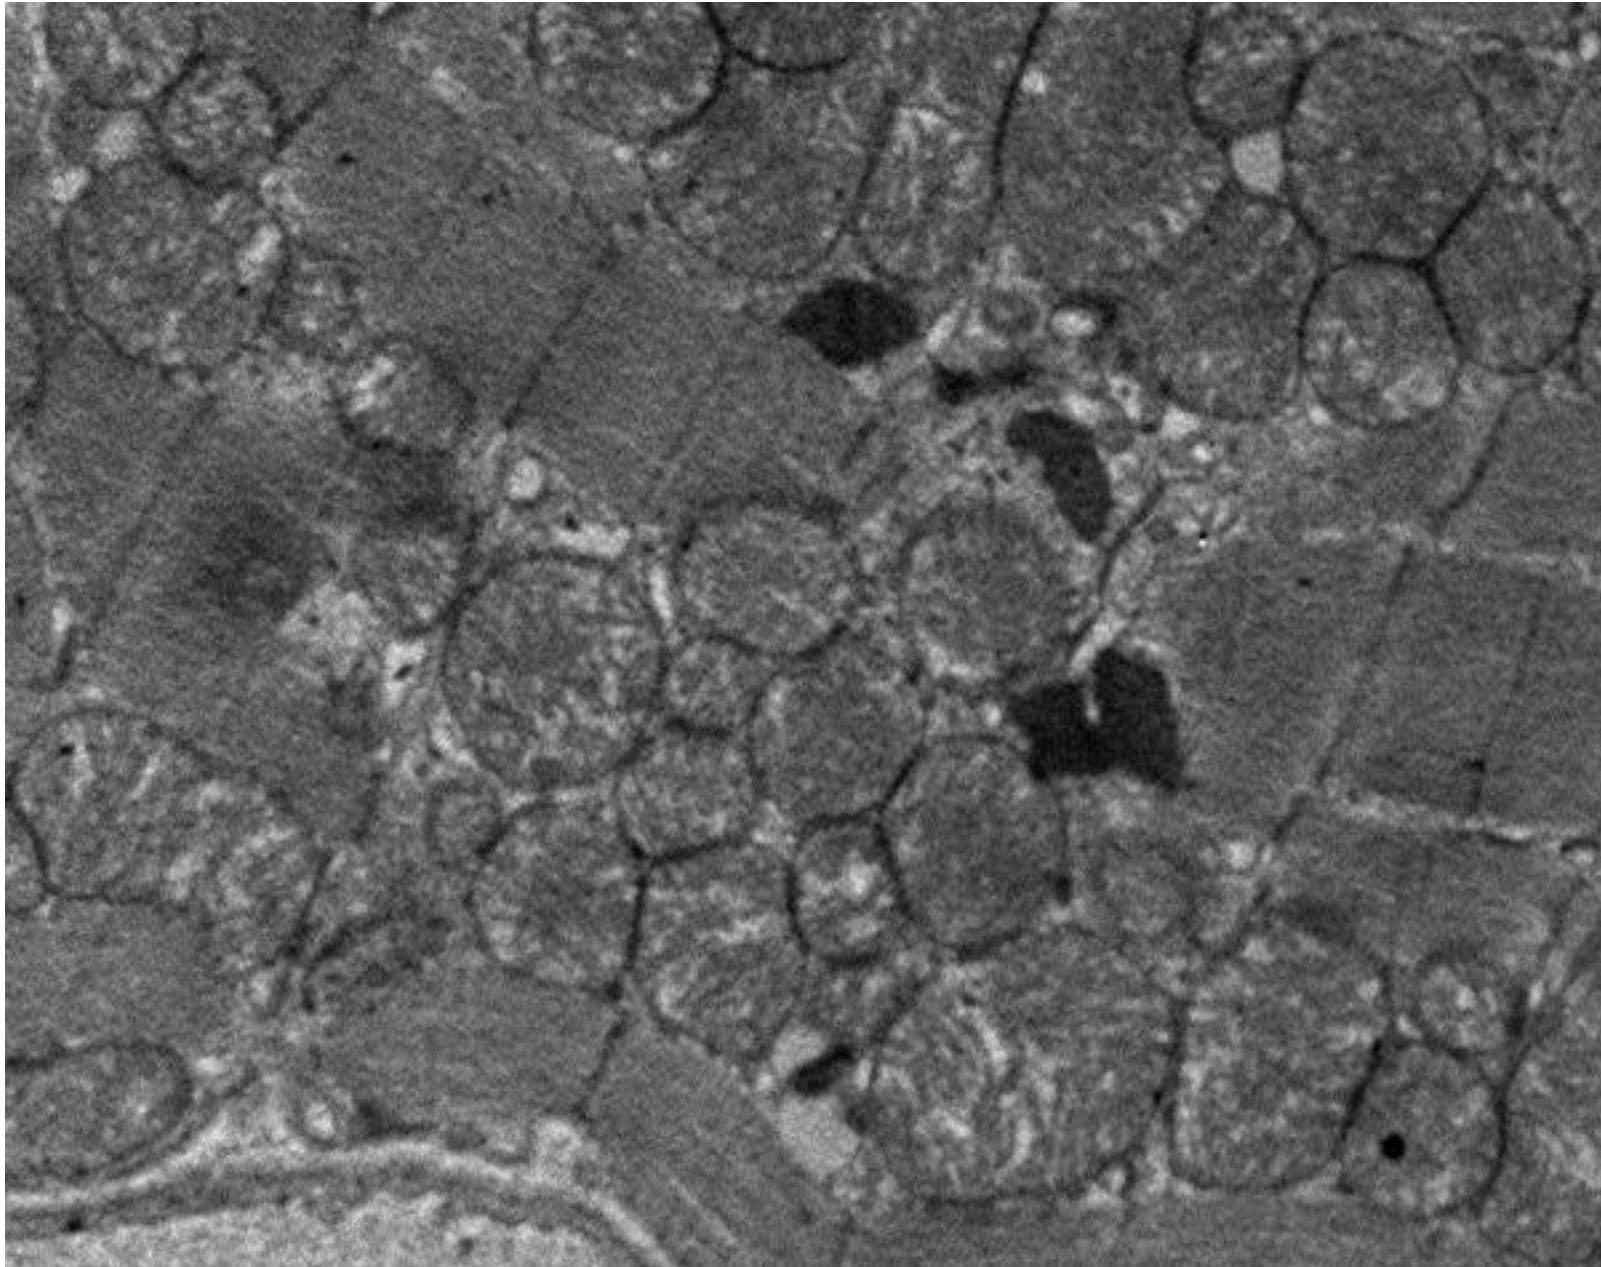

I/R+STZ

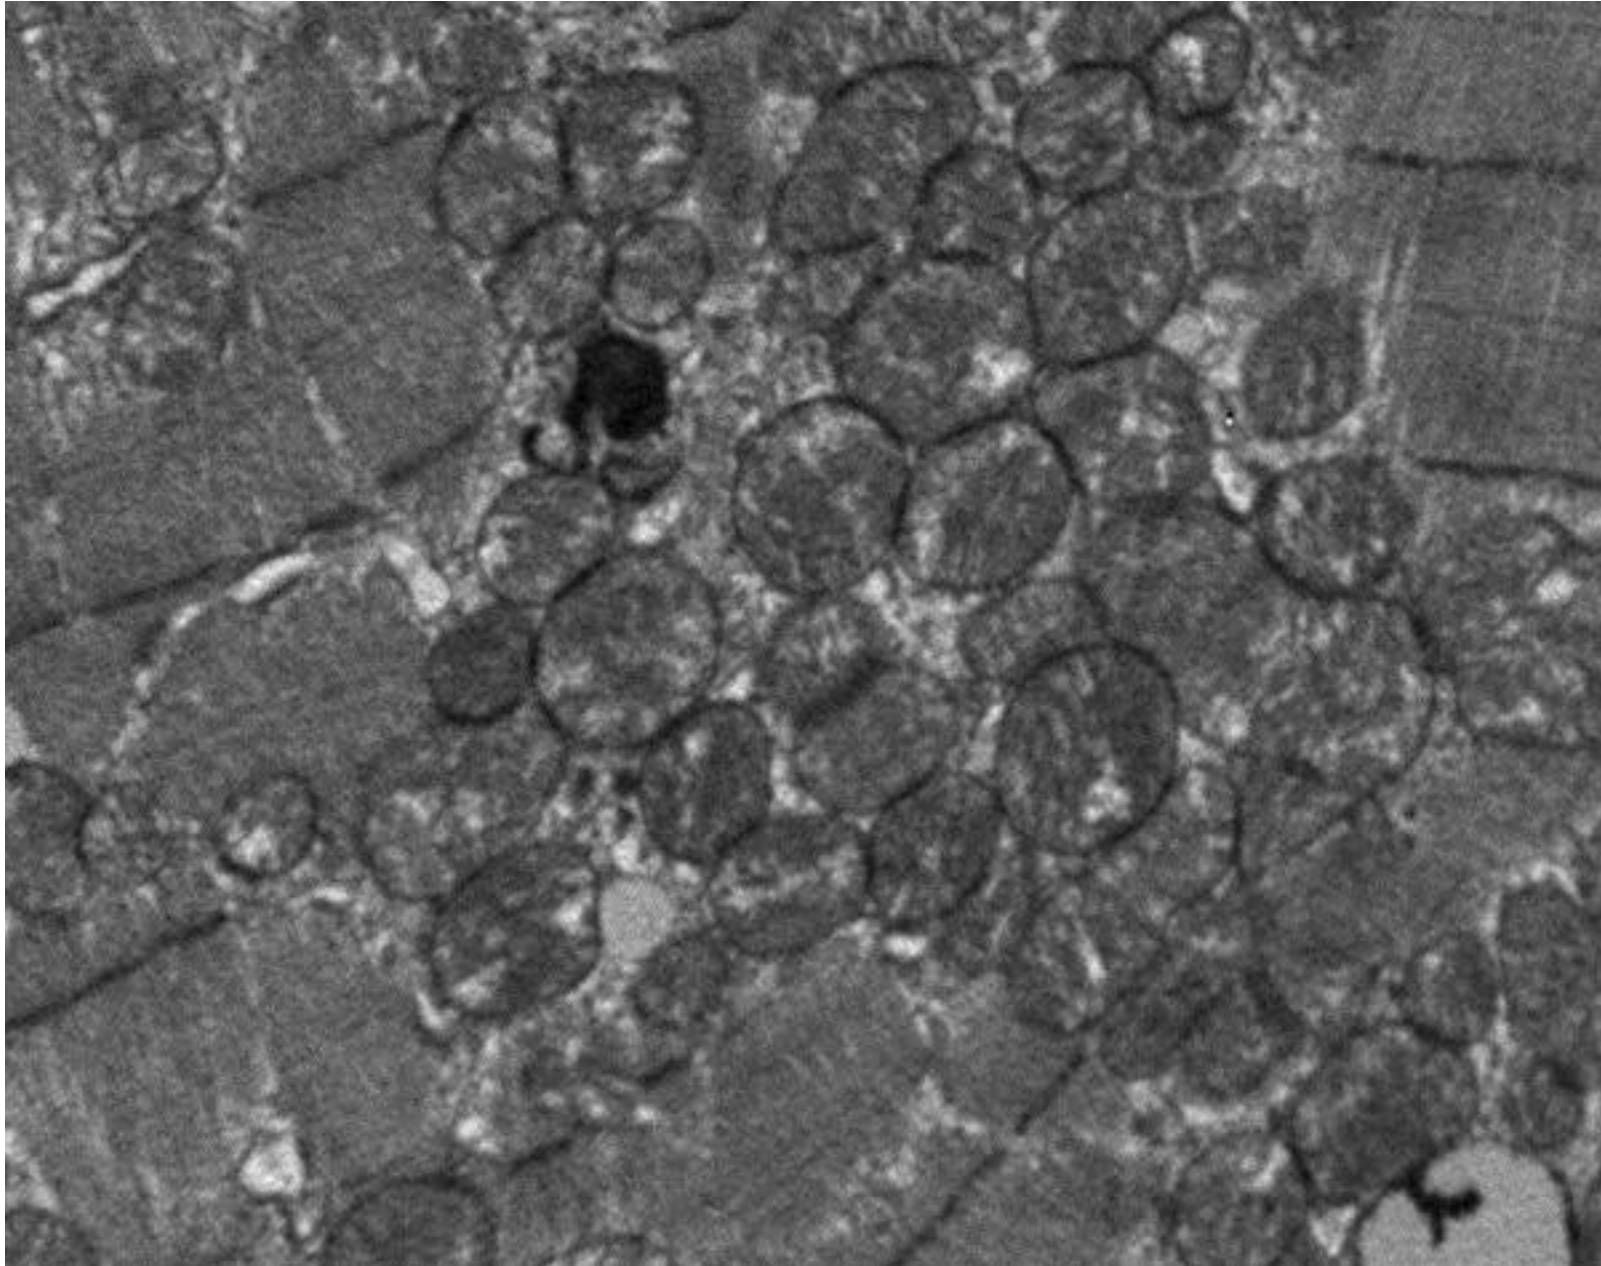

Supplement: JCMM-27-232-s002.pdf [file JCMM-27-232-s002.pdf]
